# Supplementary material for: Can DNA-Based Ecosystem Assessments Quantify Species Abundance? Testing Primer Bias and Biomass—Sequence Relationships with an Innovative Metabarcoding Protocol
Source: PLOS journal article supplement (doi:10.1371/journal.pone.0130324), 2015-07-08
Supplement: S2 (10.1371/journal.pone.0130324.s002) [file journal.pone.0130324.s002]

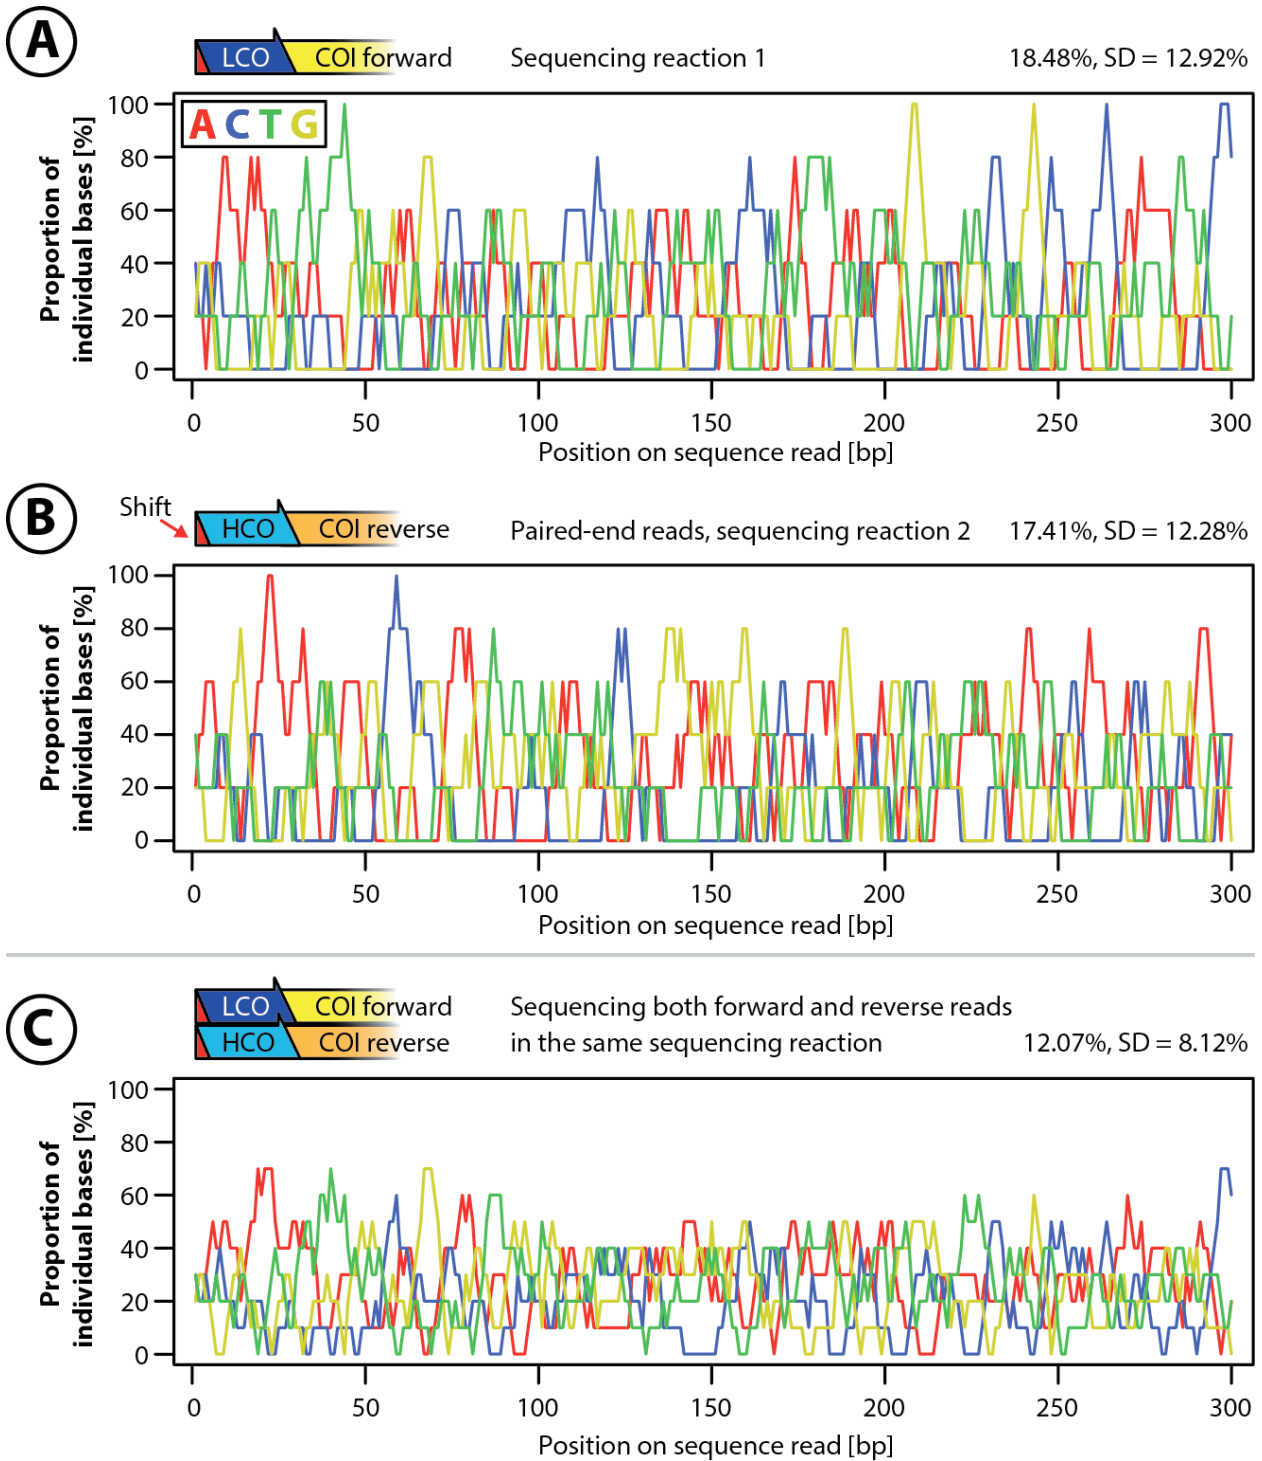

**Figure S2. Estimated sequence diversity increase by parallel sequencing amplicons in LCO and HCO direction on the MiSeq.** Estimated proportion of nucleotides per read position based on a majority consensus sequence of the 31 *Dinocras cephalotes* specimens using all 10 primer pairs developed in this study. The mean deviation from an ideal distribution of bases (each 25%) is indicated at the top right of each plot. **A** and **B** show the distribution of bases when LCO (read 1) and then HCO (read 2) is sequenced in the MiSeq run. In **C** both primers are sequenced in parallel in read 1 and read 2, which increases per-position diversity.
