# Supplementary material for: Can DNA-Based Ecosystem Assessments Quantify Species Abundance? Testing Primer Bias and Biomass—Sequence Relationships with an Innovative Metabarcoding Protocol
Source: PLoS One. 2015 Jul 8;10(7):e0130324. doi: 10.1371/journal.pone.0130324 (PMC4496048; doi:10.1371/journal.pone.0130324)
Supplement: S2 Table — (XLS) [file pone.0130324.s011.xls]

## Sheet: suple_gew_v1
Supplementary table 2: Information on specimen weights (in milligram) for experiment II. As several of the used specimens cannot be identified at species level, we used the lowest practical taxonomic unit possible. The samples and replicates have the same order as in Fig. 3 in the paper.
Specimens (Morphotaxa)	N	B	D	A	C	E	F	G	H	i	J
Ephemerella mucronata	10	0.76	0.32	0.08	0.6	0.54	0.41	0.18	0.75	0.32	0.38
Torleya major	10	1.08	0.25	0.07	0.77	0.52	0.18	0.8	0.82	0.53	0.62
Baetis	10	1.18	0.4	0.36	0.37	0.29	0.29	0.25	0.28	0.39	0.36
Leptophlebiidae	10	1.72	0.53	0.29	1.17	0.56	0.82	1.27	1.14	1.56	1.45
Ecdyonurus	10	0.39	0.27	0.29	0.34	0.42	0.52	0.3	0.33	0.42	0.67
Rhithrogena	10	0.51	0.32	0.18	0.42	0.29	0.38	0.39	0.3	0.32	0.74
Ephemeridae	10	0.99	0.53	0.25	0.44	0.41	0.6	0.33	0.39	0.76	0.97
Epeorus	10	0.28	0.24	0.46	2.4	0.3	0.38	0.32	0.31	0.5	1.02
Isoperla	5	0.81	0.38	0.19	1.12	1.13	0.89	0.89	0.71	0.71	1.78
Nemouridae	10	0.79	1.09	0.66	0.23	0.83	1.02	0.82	0.8	0.31	0.52
Leuctra	10	0.36	0.44	0.31	0.49	0.28	0.8	0.6	0.53	0.25	0.52
Perlidae	10	1.03	1.52	1.37	1.19	0.61	1.02	0.63	1.23	0.9	0.4
Thremma gallicum	10	0.97	1.44	0.3	1.43	0.56	0.13	1.02	0.48	0.14	0.22
Chaetopteryx villosa	10	1.65	0.79	0.81	2.11	0.39	0.27	1.02	1.09	0.78	1.61
Odontocerum albicorne	10	0.93	0.34	1.18	0.89	0.86	1.34	0.7	0.31	0.5	1.04
Halesus	10	0.9	0.43	0.33	0.37	0.4	0.47	0.53	1.09	0.58	0.95
Glossosomatidae	10	0.2	0.06	0.55	0.15	0.05	0.03	0.11	0.04	0.31	0.03
Drusus annulatus	10	1.48	0.4	1.02	0.55	0.75	0.94	0.98	0.74	0.77	1.31
Anomalopterygella chauvinia	10	0.96	0.6	0.68	0.73	0.9	0.48	0.53	0.38	0.61	1.29
Sericostoma personatum	10	0.6	0.3	0.1	0.42	0.15	0.26	0.48	0.24	0.3	0.42
Oecismus monedula	10	1.05	0.53	0.97	0.68	0.61	0.54	0.99	0.36	0.72	0.63
Potamophylax	10	2.36	0.58	0.34	1.27	1.08	1.45	1.43	1.16	1.19	1.09
Silo	10	0.31	0.86	0.89	0.71	0.71	0.51	0.51	0.3	0.75	0.61
Polycentropodidae	10	0.38	0.33	0.48	0.31	0.27	0.19	0.32	0.11	0.14	0.33
Philopotamidae	10	0.69	0.45	0.6	0.44	0.61	0.61	0.32	0.64	0.65	1.08
Hydropsyche	10	0.57	0.81	1.71	0.85	0.87	1.18	0.88	0.95	0.57	1.25
Rhyacophila	10	0.5	1.04	1.1	0.82	0.47	0.68	0.3	0.28	0.55	0.5
Dicranota	10	0.06	0.02	0.06	0.16	0.04	0.16	0.1	0.08	0.04	0.02
Limoniidae	1	0.79	1.34	0.58	0.97	1.17	1.03	1.37	0.85	0.63	0.45
Ceratopogonidae	10	0.23	0.26	0.18	0.17	0.19	0.49	0.21	0.27	0.25	0.25
Tipulidae	1	1.17	0.9	0.66	0.99	0.34	0.98	0.63	0.2	0.69	0.58
Ptychoptera	10	1.67	0.45	0.85	0.46	0.66	0.98	0.53	0.62	0.62	0.48
Chironomidae	10	0.64	0.37	0.7	0.71	0.39	0.63	0.77	0.74	0.7	0.71
Simuliidae	10	0.15	0.05	0.19	0.08	0.09	0.08	0.06	0.11	0.09	0.06
Blephariceridae	10	2.01	0.28	0.52	0.41	0.38	0.31	0.44	0.1	0.48	0.31
Limnius	10	0.35	0.39	0.66	0.22	0.19	0.23	0.94	0.42	0.13	0.39
Hydroporinae	10	1.33	1.2	1.09	1.58	1.16	1.08	1.3	1.12	1.16	1.29
Agabus	10	1.12	0.52	0.34	1.83	0.7	0.25	0.32	0.22	0.65	1.09
Scirtidae	10	2.19	1.47	1.02	1.16	0.6	0.73	0.51	0.73	1.12	1.01
Gerroidea	10	1.54	0.46	1.15	1.72	1.03	0.96	1.05	0.98	1.59	0.3
Sialis	10	1.92	1.03	0.37	0.72	0.92	0.64	0.42	0.65	0.68	3.03
Cordulegaster boltonii	2	1.61	0.98	2.63	1.42	0.78	1.46	1.54	1.56	0.81	0.66
Lymnaeidae	10	1.14	0.58	1.22	0.19	0.49	0.98	0.5	0.4	1.06	0.16
Ancylus	10	1.11	0.16	0.9	0.29	0.52	0.52	0.28	0.29	0.18	0.35
Pisidium	10	3.04	0.26	1.23	0.65	0.3	0.71	0.28	2.07	1.34	0.33
Asellus aquaticus	10	2.38	2.5	1.82	1.19	2.23	1.67	1.96	0.71	1.99	1.37
Gammarus	10	0.49	0.41	1.36	1	0.84	0.76	0.77	0.75	1.06	0.75
Nematoda	10	1.03	0.04	1.37	1.29	0.39	1.2	0.91	0.11	0.69	0.13
Dugesia	10	0.77	0.35	0.2	0.71	0.48	0.19	0.22	0.34	0.59	0.2
Arhynchobdellida	10	2.21	0.41	0.54	0.64	0.17	0.28	0.31	0.09	0.73	1.17
Daphnia pulex	10	0.04	0.02	0.12	0.01	0.01	0.07	0.1	0.03	0.04	0.03
Hydrachnidiae	10	0.15	0.03	0.02	0.17	0.07	0.08	0.13	0.08	0.1	0.14
PCR replicates (pooled)		1	2	3	4	5	1	2	3	4	5
Extraction		N2	N2	N2	N2	N2	TL	TL	TL	TL	TL
Primer N5		N5LCO0	N5HCO4	N5LCO1	N5LCO3	N5HCO2	N5HCO0	N5LCO4	N5HCO1	N5HCO3	N5LCO2
Primer N7		N7HCO4	N7LCO0	N7HCO3	N7HCO1	N7LCO2	N7LCO4	N7HCO0	N7LCO3	N7LCO1	N7HCO2
Abbreviations
A-J	Columns A-J show the weights of the individual tissue sets used
N	For 4 of the selected morphotaxa less than 10 specimens were available. Thus, these replicates contain tissue from the same specimen (indicated by colours)
PCR replicates	For each extraction type, 1-5 PCR replicatese were pooled. However, PCR replicates were not included in the analysis of this paper.
Tissue disruption	N2: Grounded in liquid nitrogen, TL: TissueLyser LT
Primer N5 / N7	Primer combination used
