# Supplementary material for: Can DNA-Based Ecosystem Assessments Quantify Species Abundance? Testing Primer Bias and Biomass—Sequence Relationships with an Innovative Metabarcoding Protocol
Source: PLOS journal article supplement (doi:10.1371/journal.pone.0130324), 2015-07-08
Supplement: S7 (10.1371/journal.pone.0130324.s007) [file journal.pone.0130324.s007]

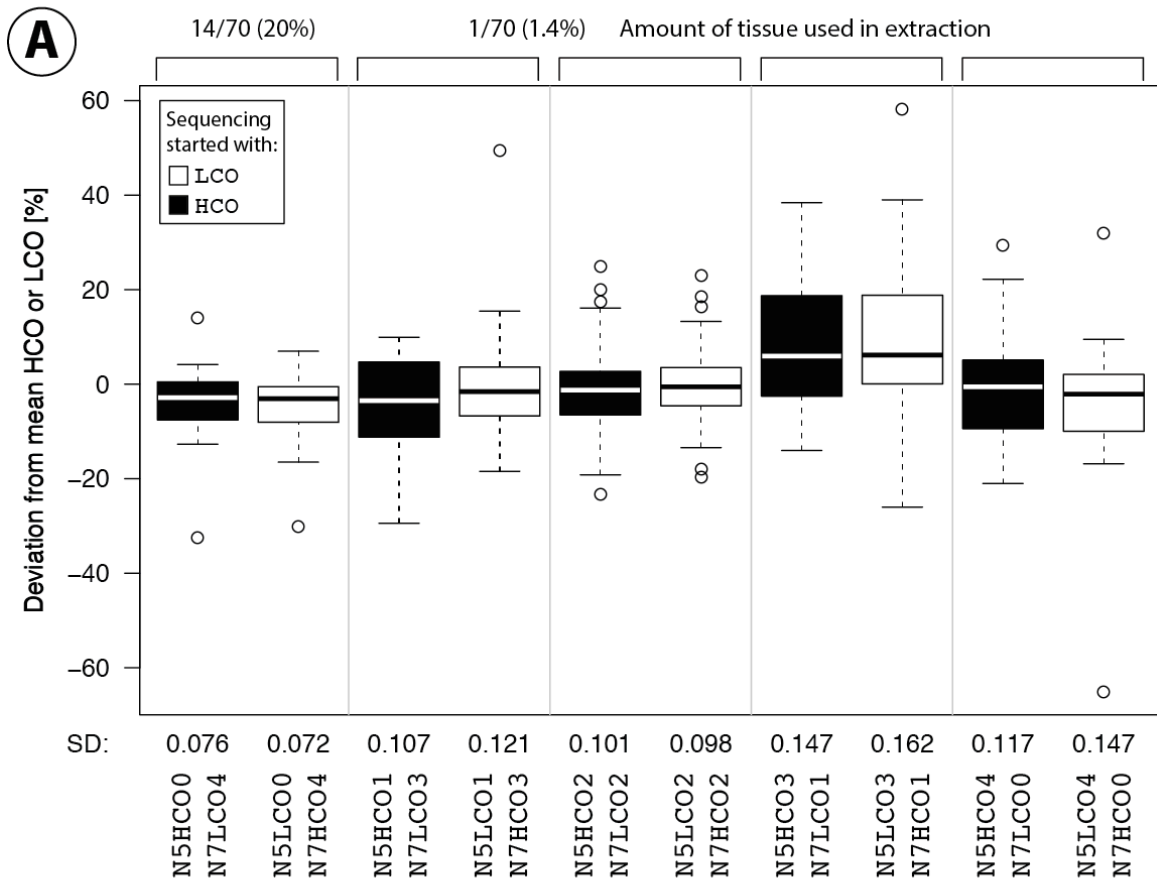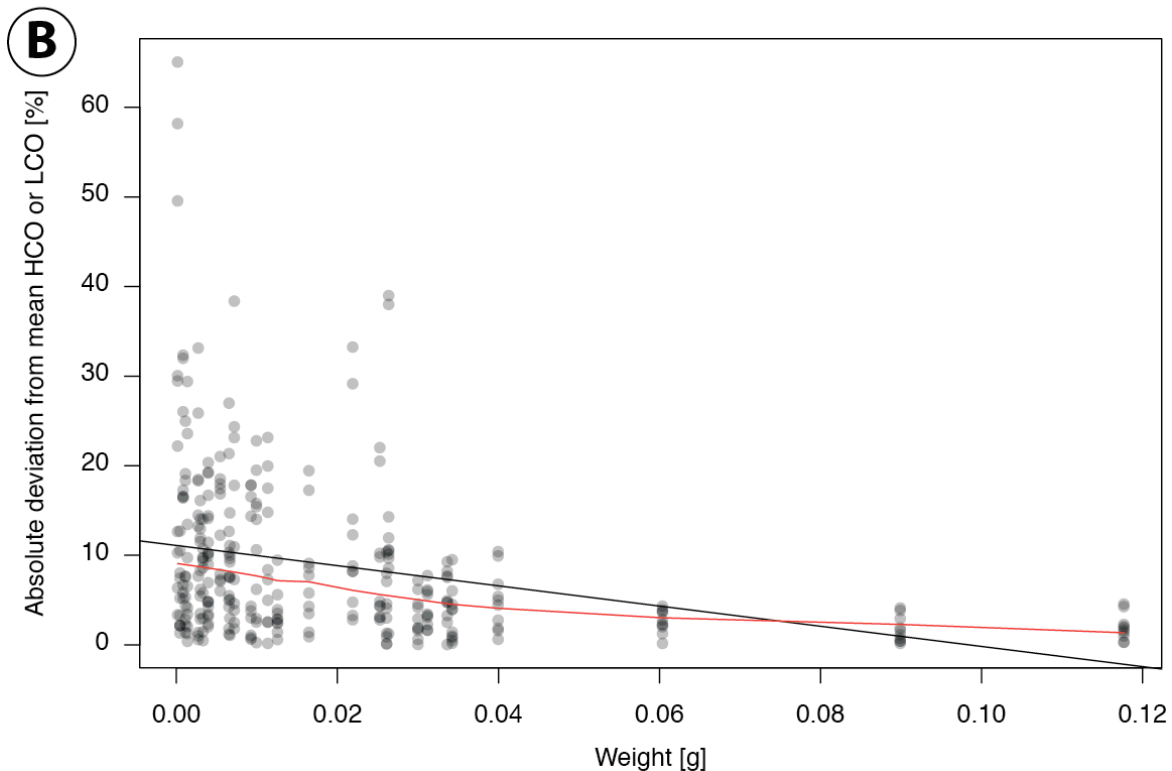

**Figure S7. Experiment I: Variability of sequence abundance across the 10 replicates and dependence on specimen biomass.** Calculated as deviation from normalised average sequence abundance for all haplotypes (calculated for the five LCO and five HCO separately due to primer bias). **A:** Variability of sequence abundance per specimen plotted for each of the 10 replicates. **B:** Variability of sequence abundance per specimen plotted against specimen weight for all 10 replicates (absolute values). Linear regression shown as black line ( $P < 0.001$ ,  $R^2 = 0.10$ ), red line shows LOWESS locally-weighted polynomial regression as implemented in R.
